# Supplementary material for: Hospital admission and mortality rates for non-COVID-19 respiratory diseases in Brazil’s public health system during the covid-19 pandemic: a nationwide observational study
Source: PubMed Central journal article supplement — J Bras Pneumol. 2023 Jan 27;49(1):e20220093. doi: 10.36416/1806-3756/e20220093 (PMC9970380; doi:10.36416/1806-3756/e20220093), 2023-01-27
Supplement: 1806-3756-jbpneu-49-01-e20220093-suppl1.pdf [file 1806-3756-jbpneu-49-01-e20220093-suppl1.pdf]

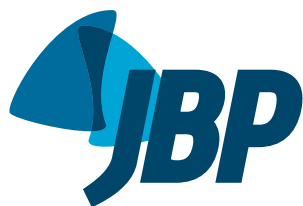

# Hospital admission and mortality rates for non-COVID-19 respiratory diseases in Brazil's public health system during the covid-19 pandemic: a nationwide observational study

Diogo de Azevedo Resende de Albuquerque<sup>1</sup>, Marcelo Dantas Tavares de Melo<sup>1</sup>,  
Thiago Lins Fagundes de Sousa<sup>2</sup>, Paulo Garcia Normando<sup>1</sup>,  
Juliana Góes Martins Fagundes<sup>2</sup>, Jose de Arimateia Batista Araujo-Filho<sup>3</sup>

**Table S1.** Number of in-hospital and outpatient procedures performed from March to December of 2015 through 2020 based on the ICD-10 and categorized according to pathophysiological similarity.

|                            | In-hospital Procedures |            | Outpatient Procedures |            |
|----------------------------|------------------------|------------|-----------------------|------------|
|                            | Number                 | Percentage | Number                | Percentage |
| Laboratory tests           |                        |            |                       |            |
| Biopsy                     | 6,321                  | 4.77%      | 6,293                 | 0.01%      |
| Bronchoalveolar Lavage     | 156                    | 0.12%      | 29,328                | 0.03%      |
| Total                      | 6,477                  | 4.89%      | 35,621                | 0.04%      |
| Imaging exams              |                        |            |                       |            |
| Bronchography              | 0                      | 0.00%      | 67                    | 0.00%      |
| Bronchoscopy               | 10,305                 | 7.77%      | 96,626                | 0.10%      |
| Chest ultrasound           | 238                    | 0.18%      | 75,726                | 0.07%      |
| Scintigraphy               | 51                     | 0.04%      | 21,004                | 0.02%      |
| Thoracic MRI               | 37                     | 0.03%      | 62,341                | 0.06%      |
| Chest X-ray                | 40,467                 | 30.52%     | 86,281,504            | 84.28%     |
| Thorax CT                  | 6,955                  | 5.25%      | 4,394,638             | 4.29%      |
| Tracheoscopy               | 28,684                 | 21.63%     | 50,725                | 0.05%      |
| Video thoracoscopy         | 5,151                  | 3.88%      | -                     | 0.00%      |
| Total                      | 91,888                 | 69.30%     | 90,982,631            | 88.87%     |
| Respiratory function tests |                        |            |                       |            |
| Respiratory function       | 1,426                  | 1.08%      | 716,154               | 0.70%      |
| Spirography                | 20                     | 0.01%      | 58,496                | 0.06%      |
| Spirometry                 | 0                      | 0.00%      | 1,136,023             | 1.11%      |
| Total                      | 1,446                  | 1.09%      | 1,910,673             | 1.87%      |
| Blood Gases (Total)        | 32,782                 | 24.72%     | 9,442,925             | 9.22%      |
| Grand Total                | 132,593                | 100.00%    | 102,371,850           | 100.00%    |

MRI: magnetic resonance imaging; CT: computed tomography.

1. Faculdade de Medicina, Universidade Federal da Paraíba, João Pessoa (PB) Brasil.  
2. Faculdade de Medicina da Universidade de São Paulo, São Paulo (SP), Brasil.  
3. Hospital Sírio-libanês, São Paulo (SP), Brasil.

**Table S2.** Number of hospitalizations and intra-hospital deaths from March to December of 2015 through 2020 based on the ICD-10 and categorized according to pathophysiological similarity.

|                                               | Hospitalizations |                | Intra-hospital Deaths |                |
|-----------------------------------------------|------------------|----------------|-----------------------|----------------|
|                                               | Number           | Percentage     | Number                | Percentage     |
| <b>Acute respiratory diseases</b>             |                  |                |                       |                |
| Acute inflammatory respiratory diseases       |                  |                |                       |                |
| Acute bronchitis and bronchiolitis            | 295,113          | 5.12%          | 1,821                 | 0.38%          |
| Acute respiratory diseases                    | 59,470           | 1.03%          | 66                    | 0.01%          |
| Acute laryngitis and tracheitis               | 52,597           | 0.91%          | 242                   | 0.05%          |
| Total                                         | 407,108          | 7.06%          | 2,129                 | 0.44%          |
| Acute airway infections                       |                  |                |                       |                |
| Influenza [flu]                               | 113,212          | 1.96%          | 5,069                 | 1.05%          |
| Pneumonia                                     | 110,100          | 1.91%          | 1,248                 | 0.26%          |
| Other acute upper airway infections           | 3,046,999        | 52.86%         | 285,538               | 59.22%         |
| Total                                         | 3,270,311        | 56.73%         | 291,855               | 60.53%         |
| Total acute respiratory diseases              | 3,677,491        | 63.79%         | 293,984               | 60.97%         |
| <b>Chronic respiratory diseases</b>           |                  |                |                       |                |
| Asthma                                        |                  |                |                       |                |
| Asthma                                        | 447,422          | 7.76%          | 2,382                 | 0.49%          |
| Bronchiectasis                                |                  |                |                       |                |
| Bronchiectasis                                | 6,787            | 0.12%          | 193                   | 0.04%          |
| Other chronic obstructive lung diseases       |                  |                |                       |                |
| Other chronic obstructive lung diseases       | 550,433          | 9.56%          | 42,504                | 8.81%          |
| Chronic diseases of the tonsils and adenoids  |                  |                |                       |                |
| Chronic diseases of the tonsils and adenoids  | 235,949          | 4.09%          | 12                    | 0.00%          |
| Pneumoconiosis                                |                  |                |                       |                |
| Pneumoconiosis                                | 3,027            | 0.05%          | 374                   | 0.08%          |
| Chronic sinusitis                             |                  |                |                       |                |
| Chronic sinusitis                             | 12,936           | 0.22%          | 43                    | 0.01%          |
| Total chronic respiratory diseases            | 1,256,554        | 21.80%         | 45,508                | 9.43%          |
| <b>Other respiratory diseases</b>             |                  |                |                       |                |
| Other diseases of the respiratory system      |                  |                |                       |                |
| Other diseases of the respiratory system      | 675,122          | 11.71%         | 141,942               | 29.44%         |
| Other diseases of the nose and sinuses        |                  |                |                       |                |
| Other diseases of the nose and sinuses        | 88,617           | 1.54%          | 38                    | 0.01%          |
| Other diseases of the upper respiratory tract |                  |                |                       |                |
| Other diseases of the upper respiratory tract | 66,943           | 1.16%          | 721                   | 0.15%          |
| Total Other Respiratory Diseases              | 830,682          | 14.41%         | 142,701               | 29.60%         |
| <b>Grand Total</b>                            | <b>5,764,727</b> | <b>100.00%</b> | <b>482,193</b>        | <b>100.00%</b> |

**Table S3.** Statistical analysis of the number of hospitalizations based on the ICD-10 classification from March to December, comparing the years 2019 and 2020.

|                                                  | March to<br>December<br>2019 | March to<br>December<br>2020 | %<br>difference | Estimated<br>number of<br>procedures | (CI > 95%)          | p-value |
|--------------------------------------------------|------------------------------|------------------------------|-----------------|--------------------------------------|---------------------|---------|
| <b>Acute respiratory diseases</b>                |                              |                              |                 |                                      |                     |         |
| <b>Acute inflammatory respiratory diseases</b>   |                              |                              |                 |                                      |                     |         |
| Acute bronchitis and<br>bronchiolitis            | 61,393                       | 16,786                       | -73%            | 65,494                               | 55,239 - 75,748     | 0.0000  |
| Acute respiratory diseases                       | 11,610                       | 4,880                        | -58%            | 12,199                               | 10,809 - 13,588     | 0.0000  |
| Acute laryngitis and<br>tracheitis               | 8,832                        | 3,149                        | -64%            | 8,529                                | 5,899 - 11,158      | 0.0004  |
| Total                                            | 81,835                       | 24,815                       | -70%            | 86,222                               | 73,248 - 99,194     | 0.0000  |
| <b>Acute airway infections</b>                   |                              |                              |                 |                                      |                     |         |
| Influenza [flu]                                  | 16,269                       | 22,341                       | 37%             | 14,349                               | 8,328 - 20,369      | 0.0015  |
| Pneumonia                                        | 560,335                      | 301,943                      | -46%            | 559,826                              | 529,014 - 590,637   | 0.0000  |
| Other acute upper airway<br>infections           | 20,666                       | 11,118                       | -46%            | 21,454                               | 18,436 - 24,472     | 0.0001  |
| Total                                            | 597,270                      | 335,402                      | -44%            | 595,629                              | 566,379 - 624,879   | 0.0000  |
| Total acute respiratory diseases                 | 679,105                      | 360,217                      | -47%            | 681,851                              | 639,627 - 724,073   | 0.0000  |
| <b>Chronic respiratory diseases</b>              |                              |                              |                 |                                      |                     |         |
| Asthma                                           | 70,179                       | 38,137                       | -46%            | 63,158                               | 47,309 - 79,006     | 0.0009  |
| Bronchiectasis                                   | 1,130                        | 521                          | -54%            | 1,077                                | 448 - 1,705         | 0.0048  |
| Other chronic obstructive lung<br>diseases       | 94,987                       | 51,915                       | -45%            | 91,825                               | 79,315 - 10,4334    | 0.0001  |
| Chronic diseases of the tonsils<br>and adenoids  | 46,908                       | 15,785                       | -66%            | 46,529                               | 35,543 - 57,513     | 0.0002  |
| Pneumoconiosis                                   | 560                          | 408                          | -27%            | 557                                  | 400 - 713           | 0.0039  |
| Chronic sinusitis                                | 2,570                        | 1,157                        | -55%            | 2,650                                | 2,516 - 2,784       | 0.0000  |
| Total chronic respiratory diseases               | 216,334                      | 107,923                      | -50%            | 205,796                              | 173,355 - 238,236   | 0.0001  |
| <b>Other respiratory diseases</b>                |                              |                              |                 |                                      |                     |         |
| Other diseases of the<br>respiratory system      | 113,494                      | 120,339                      | 6%              | 113,494                              | 107,254 - 118,460   | 0.0015  |
| Other diseases of the nose and<br>sinuses        | 17,422                       | 6,722                        | -61%            | 17,422                               | 11,155 - 22,118     | 0.0006  |
| Other diseases of the upper<br>respiratory tract | 11,218                       | 5,703                        | -49%            | 11,218                               | 8,317 - 13,036      | 0.0004  |
| Total Other Respiratory Diseases                 | 142,134                      | 132,764                      | -7%             | 142,134                              | 128,217 - 152,125   | 0.0128  |
| Grand Total                                      | 1,037,573                    | 600,904                      | -42%            | 1,027,819                            | 948,420 - 1,107,216 | 0.0000  |

**Table S4.** Number of hospitalizations and intra-hospital deaths from March to December of 2015 through 2020 based on the nature of the service (elective or urgent), age, race, and sex.

|                              | Hospitalizations |            | Intra-hospital Deaths |            |
|------------------------------|------------------|------------|-----------------------|------------|
|                              | Number           | Percentage | Number                | Percentage |
| <b>Nature of the service</b> |                  |            |                       |            |
| Elective                     | 555,235          | 9.63%      | 18,419                | 3.82%      |
| Urgent                       | 5,209,492        | 90.37%     | 463,774               | 96.18%     |
| Total                        | 5,764,727        | 100.00%    | 482,193               | 100.00%    |
| <b>Age (years)</b>           |                  |            |                       |            |
| 0-19                         | 2,412,247        | 41.85%     | 15,243                | 3.16%      |
| 20-59                        | 1,263,780        | 21.92%     | 88,939                | 18.45%     |
| 60+                          | 2,088,700        | 36.23%     | 378,011               | 78.39%     |
| Total                        | 5,764,727        | 100.00%    | 482,193               | 100.00%    |
| <b>Race</b>                  |                  |            |                       |            |
| White                        | 2,003,485        | 34.76%     | 194,796               | 40.40%     |
| Brown                        | 1,978,674        | 34.32%     | 137,582               | 28.53%     |
| Black                        | 169,125          | 2.93%      | 18,970                | 3.94%      |
| Asian                        | 107,822          | 1.87%      | 8,400                 | 1.74%      |
| Indigenous                   | 27,398           | 0.48%      | 774                   | 0.16%      |
| Not informed                 | 1,478,223        | 25.64%     | 121,671               | 25.23%     |
| Total                        | 5,764,727        | 100.00%    | 482,193               | 100.00%    |
| <b>Sex</b>                   |                  |            |                       |            |
| Female                       | 2,740,282        | 47.54%     | 228,521               | 47.39%     |
| Male                         | 3,024,445        | 52.46%     | 253,672               | 52.61%     |
| Total                        | 5,764,727        | 100.00%    | 482,193               | 100.00%    |

**Table S5.** Number of hospitalizations and intra-hospital deaths from March to December of 2015 through 2020 according to federative region and state.

| Federative Region | State     | Hospitalizations |            | Intra-hospital Deaths |            |
|-------------------|-----------|------------------|------------|-----------------------|------------|
|                   |           | Number           | Percentage | Number                | Percentage |
| Midwest           | DF        | 78,761           | 1.37%      | 4,539                 | 0.94%      |
|                   | GO        | 177,198          | 3.07%      | 11,989                | 2.49%      |
|                   | MS        | 96,358           | 1.67%      | 8,130                 | 1.69%      |
|                   | MT        | 93,635           | 1.62%      | 6,560                 | 1.36%      |
|                   | Total     | 445,952          | 7.73%      | 31,218                | 6.48%      |
| Northeast         | AL        | 64,470           | 1.12%      | 6,433                 | 1.33%      |
|                   | BA        | 406,570          | 7.05%      | 25,267                | 5.24%      |
|                   | CE        | 234,794          | 4.07%      | 22,492                | 4.66%      |
|                   | MA        | 224,929          | 3.90%      | 8,184                 | 1.70%      |
|                   | PB        | 102,198          | 1.77%      | 9,134                 | 1.90%      |
|                   | PE        | 213,020          | 3.70%      | 18,668                | 3.87%      |
|                   | PI        | 120,485          | 2.09%      | 6,420                 | 1.33%      |
|                   | RN        | 57,777           | 1.00%      | 5,991                 | 1.24%      |
|                   | SE        | 36,122           | 0.63%      | 4,106                 | 0.85%      |
| Total             | 1,460,365 | 25.33%           | 106,695    | 22.12%                |            |
| North             | AC        | 15,939           | 0.28%      | 1,773                 | 0.37%      |
|                   | AM        | 76,779           | 1.33%      | 4,779                 | 0.99%      |
|                   | AP        | 18,980           | 0.33%      | 938                   | 0.19%      |
|                   | PA        | 262,072          | 4.55%      | 10,931                | 2.27%      |
|                   | RO        | 62,148           | 1.08%      | 3,388                 | 0.70%      |
|                   | RR        | 16,866           | 0.29%      | 1,338                 | 0.28%      |
|                   | TO        | 34,415           | 0.60%      | 2,355                 | 0.49%      |
|                   | Total     | 487,199          | 8.46%      | 25,502                | 5.29%      |
| Southeast         | ES        | 110,034          | 1.91%      | 8,863                 | 1.84%      |
|                   | MG        | 619,537          | 10.75%     | 54,501                | 11.30%     |
|                   | RJ        | 264,452          | 4.59%      | 36,540                | 7.58%      |
|                   | SP        | 1,162,092        | 20.16%     | 119,310               | 24.74%     |
|                   | Total     | 2,156,115        | 37.41%     | 219,214               | 45.46%     |
| South             | PR        | 472,168          | 8.19%      | 32,540                | 6.75%      |
|                   | RS        | 474,122          | 8.22%      | 45,318                | 9.40%      |
|                   | SC        | 268,806          | 4.66%      | 21,706                | 4.50%      |
|                   | Total     | 1,215,096        | 21.07%     | 99,564                | 20.65%     |
| Grand Total       |           | 5,764,727        | 100.00%    | 482,193               | 100.00%    |

**Table S6.** Number of in-hospital and outpatient procedures from March to December of 2015 through 2020 according to federative region and state.

| Federative Region | State  | In-hospital Procedures |            | Outpatient Procedures |            |
|-------------------|--------|------------------------|------------|-----------------------|------------|
|                   |        | Number                 | Percentage | Number                | Percentage |
| Midwest           | DF     | 1,087                  | 0.82%      | 1,024,586             | 1.00%      |
|                   | GO     | 1,386                  | 1.05%      | 2,567,113             | 2.51%      |
|                   | MS     | 1,583                  | 1.19%      | 717,704               | 0.70%      |
|                   | MT     | 176                    | 0.13%      | 1,709,076             | 1.67%      |
|                   | Total  | 4,232                  | 3.19%      | 6,018,479             | 5.88%      |
| Northeast         | AL     | 1,011                  | 0.76%      | 476,108               | 0.47%      |
|                   | BA     | 3,412                  | 2.57%      | 4,231,886             | 4.13%      |
|                   | CE     | 211                    | 0.16%      | 3,421,635             | 3.34%      |
|                   | MA     | 251                    | 0.19%      | 2,406,761             | 2.35%      |
|                   | PB     | 615                    | 0.46%      | 867,251               | 0.85%      |
|                   | PE     | 2,440                  | 1.84%      | 3,020,744             | 2.95%      |
|                   | PI     | 278                    | 0.21%      | 622,119               | 0.61%      |
|                   | RN     | 1,214                  | 0.92%      | 658,919               | 0.64%      |
|                   | SE     | 139                    | 0.10%      | 304,661               | 0.30%      |
| Total             | 9,571  | 7.22%                  | 16,010,084 | 15.64%                |            |
| North             | AC     | 122                    | 0.09%      | 566,284               | 0.55%      |
|                   | AM     | 101                    | 0.08%      | 2,407,703             | 2.35%      |
|                   | AP     | 18                     | 0.01%      | 968,729               | 0.95%      |
|                   | PA     | 848                    | 0.64%      | 2,872,021             | 2.81%      |
|                   | RO     | 150                    | 0.11%      | 1,316,132             | 1.29%      |
|                   | RR     | 11                     | 0.01%      | 590,100               | 0.58%      |
|                   | TO     | 116                    | 0.09%      | 593,224               | 0.58%      |
| Total             | 1,366  | 1.03%                  | 9,314,193  | 9.10%                 |            |
| Southeast         | ES     | 1,776                  | 1.34%      | 2,068,241             | 2.02%      |
|                   | MG     | 20,932                 | 15.79%     | 9,027,259             | 8.82%      |
|                   | RJ     | 3,976                  | 3.00%      | 10,779,838            | 10.53%     |
|                   | SP     | 24,930                 | 18.80%     | 36,399,075            | 35.56%     |
| Total             | 51,614 | 38.93%                 | 58,274,413 | 56.92%                |            |
| South             | PR     | 28,779                 | 21.70%     | 4,042,569             | 3.95%      |
|                   | RS     | 19,200                 | 14.48%     | 5,475,839             | 5.35%      |
|                   | SC     | 17,831                 | 13.45%     | 3,236,273             | 3.16%      |
|                   | Total  | 65,810                 | 49.63%     | 12,754,681            | 12.46%     |
| Grand Total       |        | 132,593                | 100.00%    | 102,371,850           | 100.00%    |
